# Supplementary material for: Arginyl-glutamine dipeptide attenuates experimental colitis by enhancing antioxidant function and inhibiting nuclear factor-kappaB
Source: Royal Society of Chemistry journal article supplement (doi:10.1039/c5ra16739f), 2015-01-01
Supplement: c5ra16739f1.pdf [file c5ra16739f1.pdf]

Supplementary Materials

Table1 PCR primer sequences: the forward primers (F) and the reverse primers (R) used in this study.

| Gene           | Primer sequences                                          |
|----------------|-----------------------------------------------------------|
| $\beta$ -actin | F: AGAGGGAAATCGTGCGTGAC<br>R: CAATAGTGATGACCTGGCCGT       |
| IL-1 $\beta$   | F: ATGAAAGACGGCACACCCAC<br>R: GCTTGTGCTCTGCTTGTGAG        |
| IL-6           | F: GATGCTACCAAACCTGGATATAATC<br>R: GGCCTTAGCCACTCCTTCTGTG |
| IL-10          | F: ACAGCCGGGAAGACAATAAC<br>R: CAGCTGGTCCTTTGTTTGAAAG      |
| TNF- $\alpha$  | F: AGGCACTCCCCCAAAGAT<br>R: TGAGGGTCTGGGCCATAGAA          |
| CAT            | F: AAGATTGCCTTCTCCGGGTG<br>R: GACCCCGCGGTCATGATATT        |
| SOD1           | F: CCACTGCAGGACCTCATT<br>R: CACCTTTGCCCAAGTCATCT          |
| SOD2           | F: GCCCAAACCTATCGTGTCCA<br>R: AGGGAACCCTAAATGCTGCC        |
| Gpx1           | F: TGCAATCAGTTCGGACACCA<br>R: AAGGTAAAGAGCGGGTGAGC        |
| Gpx2           | F: GTGTGATGTCAATGGGCAGAA<br>R: ACGTTTGATGTCAGGCTCGAT      |
| Gpx3           | F: TCTGAACCACTGTGGACACG<br>R: TCAAGCAGGCAGATACGTGG        |
| Gpx4           | F: TAAGAGACGTCAGTGGGCGT<br>R: GCACACGAAACCCCTGTACT        |
| HO1            | F: AGGCACTGCTGACAGAGGAAC<br>R: AGCGGTGTCTGGGATGAACTA      |
| NQO1           | F: CGCAGAGAGGACATCATTCA<br>R: CGCCAGAGATGACTCAACAG        |
| GSTK1          | F: GAGCATGGAGCAACCAGAGAT<br>R: AGCTTGCTCTTCACCAGTTCG      |
| GSTP1          | F: GAGGCAAAGCTTTCATTGTGG<br>R: GTTGATGGGACGGTTCAAATG      |
| GSTT2          | F: GAGGAAAAGGTGGAACGGAAC<br>R: CGCCCCTCAAACAGATTACAG      |
